# Supplementary material for: Complex formation and cytotoxicity of Triapine derivatives: a comparative solution study on the effect of the chalcogen atom and NH-methylation
Source: Royal Society of Chemistry journal article supplement (doi:10.1039/d0dt03465g), 2020-01-01
Supplement: d0dt03465g1.pdf [file d0dt03465g1.pdf]

SUPPLEMENTARY INFORMATION

**Complex formation and cytotoxicity of Triapine derivatives: a comparative solution study on the effect of the chalcogen atom and NH-methylation**

Éva A. Enyedy,\* Nóra V. May, Veronika F.S. Pape, Petra Heffeter, Gergely Szakács,  
Bernhard K. Keppler, Christian R. Kowol

**Table S1.** Calculated absorption maxima ( $\lambda_{\max}$ ), molar absorptivity ( $\epsilon$ ) and chemical shifts ( $\delta$ ) of the ligand species in the different protonation states. { $T = 25\text{ }^{\circ}\text{C}$ ,  $I = 0.10\text{ M}$  (KCl)}

|                                                                           | O-Triapine  | Triapine    | Se-Triapine | Me-Triapine |
|---------------------------------------------------------------------------|-------------|-------------|-------------|-------------|
| $\lambda_{\max} / \text{nm}$ ( $\epsilon / \text{M}^{-1}\text{cm}^{-1}$ ) |             |             |             |             |
| $\text{H}_2\text{L}^+$                                                    | 382 (13700) | 402 (20600) | 412 (19400) |             |
|                                                                           |             | 290 (10800) | 288 (9400)  |             |
| $\text{HL}^{+0}$                                                          | 352 (11300) | 368 (15600) | 372 (16480) | 406 (22100) |
|                                                                           |             | 290 (11500) | 300 (7400)  |             |
| $\text{L}^{0/-}$                                                          |             | 376 (17200) | 376 (16060) | 364 (18160) |
| $\delta / \text{ppm}$                                                     |             |             |             |             |
| <b>CH=N</b> $\text{HL}^+ / \text{L}$                                      | 8.21 / 8.14 |             |             | 8.07 / 8.16 |
| <b>CH(4)</b> $\text{HL}^+ / \text{L}$                                     | 7.81 / 7.31 |             |             | 7.83 / 7.36 |
| <b>CH(5)</b> $\text{HL}^+ / \text{L}$                                     | 7.64 / 7.25 |             |             | 7.67 / 7.31 |
| <b>CH(6)</b> $\text{HL}^+ / \text{L}$                                     | 7.99 / 7.94 |             |             | 8.02 / 8.00 |

## SUPPLEMENTARY INFORMATION

**Table S2** Overall stability constants ( $\log\beta$ ) of the Cu(II) complexes of the studied ligands determined by various methods in 30% (w/w) DMSO/H<sub>2</sub>O.  $\{T = 25\text{ }^\circ\text{C}, I = 0.10\text{ M (KCl)}\}$  <sup>a</sup>

| $\log\beta$                                    | <b>O-Triapine</b> <sup>b</sup> |                                   |                    |
|------------------------------------------------|--------------------------------|-----------------------------------|--------------------|
|                                                | <i>UV-vis</i>                  | <i>pH-pot.</i>                    | <i>EPR</i>         |
| [CuLH] <sup>2+</sup>                           | 4.76(4)                        | 4.80(2)                           | 4.83(2)            |
| [CuL] <sup>+</sup>                             | 0.29(2)                        | 0.22(2)                           | 0.28 <sup>c</sup>  |
| [CuLH <sub>1</sub> ]                           | -7.56(5)                       | -8.56(2)                          | -8.50 <sup>d</sup> |
| [CuLH <sub>2</sub> ] <sup>-</sup>              | -18.21(6)                      | -19.48(3)                         | -19.65(3)          |
| [CuL <sub>2</sub> ]                            | -                              | -                                 | -5.63(6)           |
|                                                | <b>Triapine</b> <sup>e</sup>   |                                   |                    |
|                                                | <i>pH-pot.</i>                 | <i>EPR</i>                        |                    |
| [CuLH] <sup>2+</sup>                           | -                              | 16.69                             |                    |
| [CuL] <sup>+</sup>                             | 13.89                          | 14.35                             |                    |
| [CuLH <sub>1</sub> ]                           | 5.89                           | 4.68                              |                    |
| [CuLH <sub>2</sub> ] <sup>-</sup>              | -5.98                          | -7.57                             |                    |
| [CuL <sub>2</sub> H] <sup>+</sup>              | 27.16                          | 28.67                             |                    |
| [CuL <sub>2</sub> ]                            | 20.32                          | 20.95 <sup>f</sup>                |                    |
| [Cu <sub>2</sub> L <sub>3</sub> ] <sup>+</sup> | 38.79                          | 39.50                             |                    |
|                                                | <b>Se-Triapine</b>             |                                   | <b>Me-Triapine</b> |
|                                                | <i>UV-vis</i>                  |                                   | <i>UV-vis</i>      |
| [CuLH] <sup>2+</sup>                           | ≥ 20.3                         | [CuL] <sup>2+</sup>               | ≥ 11               |
| [CuL] <sup>+</sup>                             | ≥ 18.55(6)                     | [CuLH <sub>1</sub> ] <sup>+</sup> | ≥ 4.64(4)          |
| [CuLH <sub>1</sub> ]                           | ≥ 9.12(15)                     | [CuLH <sub>2</sub> ]              | ≥ <i>c.a.</i> -4.8 |

<sup>a</sup> Uncertainties (SD) are shown in parentheses for the complexes determined in the present work. <sup>b</sup> O-Triapine possesses only one dissociable proton in the studied pH range (pyridinium NH<sup>+</sup>) and only p*K*<sub>1</sub> could be determined accurately (p*K*<sub>2</sub> was too high). Thus, during the computation of the  $\log\beta$  values of the complexes the ligand was considered as a monoprotic ligand: HL<sup>+</sup> was used as the fully protonated form instead of H<sub>2</sub>L<sup>+</sup>. <sup>c</sup> Two isomers were detected. Isomer H (with higher *g*<sub>0</sub> value):  $\log\beta = 0.21(2)$  and isomer L (with lower *g*<sub>0</sub> value):  $\log\beta = 0.53(8)$ . <sup>d</sup> Two isomers were detected. Isomer H:  $\log\beta = -8.73(2)$  and isomer L:  $\log\beta = -8.90(3)$ . <sup>e</sup> Data taken from Ref. [30] <sup>f</sup> Two isomers were detected. Isomer L (with lower *g*<sub>0</sub> value):  $\log\beta = 20.66$  and isomer H (with higher *g*<sub>0</sub> value):  $\log\beta = 20.64$ , reported in Ref. [30]

[30] É. A. Enyedy, N. V. Nagy, É. Zsigó, C. R. Kowol, V. B. Arion, A. Roller, B. K. Keppler and T. Kiss, Eur. J. Inorg. Chem., 2010, 2010, 1717, DOI: 10.1002/ejic.200901174

SUPPLEMENTARY INFORMATION

**Table S3** Overall stability constants ( $\log\beta$ ) of the Fe(III) and Fe(II) complexes of the studied ligands determined by pH-potentiometry in 30% (w/w) DMSO/H<sub>2</sub>O.  $\{T = 25\text{ }^\circ\text{C}, I = 0.10\text{ M (KCl)}\}$  <sup>a</sup>

| $\log\beta$                                         | O-Triapine <sup>b</sup> | Triapine <sup>c</sup> | Se-Triapine | $\log\beta$                             | Me-Triapine |
|-----------------------------------------------------|-------------------------|-----------------------|-------------|-----------------------------------------|-------------|
| [Fe(II)LH] <sup>2+</sup>                            |                         | 15.91                 |             |                                         |             |
| [Fe(II)L] <sup>+</sup>                              | -4.96(3)                | 12.29                 | 10.56(9)    | [Fe(II)L] <sup>2+</sup>                 | 7.05(9)     |
| [Fe(II)L <sub>2</sub> H] <sup>+</sup>               |                         | 27.70                 |             |                                         |             |
| [Fe(II)L <sub>2</sub> ]                             | -12.49(5)               | 22.55                 | 19.9(1)     | [Fe(II)L <sub>2</sub> ] <sup>2+</sup>   | 11.96(9)    |
| [Fe(II)L <sub>2</sub> H <sub>1</sub> ] <sup>-</sup> |                         | 10.83                 |             |                                         |             |
| [Fe(III)LH] <sup>3+</sup>                           | 10.55(3) <sup>d</sup>   |                       |             |                                         |             |
| [Fe(III)L] <sup>2+</sup>                            | 6.43(3) <sup>d</sup>    | 14.03                 | 11.02(10)   |                                         |             |
| [Fe(III)L <sub>2</sub> ] <sup>+</sup>               |                         | 26.25                 | 22.31(9)    |                                         |             |
|                                                     |                         |                       |             | [Fe(III)LH <sub>1</sub> ] <sup>2+</sup> | 1.96(9)     |

<sup>a</sup> Uncertainties (SD) are shown in parentheses for the complexes determined in the present work. <sup>b</sup> O-Triapine possesses only one dissociable proton in the studied pH range (pyridinium NH<sup>+</sup>) and only pK<sub>1</sub> could be determined accurately (pK<sub>2</sub> was too high). Thus, during the computation of the  $\log\beta$  values of the complexes the ligand was considered as a monoprotic ligand: HL<sup>+</sup> was used as the fully protonated form instead of H<sub>2</sub>L<sup>+</sup>. <sup>c</sup> Data taken from Ref. [31] <sup>d</sup> Determined by UV-vis spectrophotometry.

[31] É. A. Enyedy, M. F. Primik, C. R. Kowol, V. B. Arion, T. Kiss and B. K. Keppler, Dalton Trans., 2011, 40, 5895, DOI: 10.1039/C0DT01835J

SUPPLEMENTARY INFORMATION

**Table S4.** Isotropic EPR parameters of the components obtained for Cu(II) complexes of O-Triapine. (Uncertainties (SD) are shown in parentheses.)

|                              | $g_0$     | $A_0/G$  | $a_0^N/G$                   | $\alpha/G$ | $\beta/G$ | $\gamma/G$ |
|------------------------------|-----------|----------|-----------------------------|------------|-----------|------------|
| $Cu^{2+}$                    | 2.192(1)  | 33.2(8)  |                             | 45(1)      | -2.4(6)   | 0.1(5)     |
| <b>O-Triapine</b>            |           |          |                             |            |           |            |
| $[CuLH]^{2+}$                | 2.1431(4) | 50.15(4) | 14.4(7)                     | 45.6(6)    | -16.7(3)  | 1.2(1)     |
| $[CuL]^+$                    |           |          |                             |            |           |            |
| isomer 1                     | 2.1240(2) | 61.4(2)  | 12.2(4),<br>13.9(3)         | 30.6(3)    | -15.5(1)  | 2.5(2)     |
| isomer 2                     | 2.104(2)  | 64(2)    | 15(1),<br>15(1),<br>17(2)   | 33(2)      | -15(1)    | 1.5(8)     |
| $[CuLH_1]$                   |           |          |                             |            |           |            |
| isomer 1                     | 2.1243(5) | 38.1(5)  | 12.8(7),<br>13(1)           | 33.8(9)    | -17.5(3)  | 2.9(1)     |
| isomer 2                     | 2.0915(5) | 54.0(8)  | 17.4(8),<br>14(1),<br>14(1) | 33(1)      | -17.0(1)  | 2.1(5)     |
| $[CuLH_2]^-$                 | 2.0959(1) | 84.8(1)  | 16.7(2),<br>15.3(2)         | 24.0(1)    | -15.9(1)  | 3.7(1)     |
| $[CuL_2]$                    | 2.125(2)  | 12(3)    |                             | 29(2)      | -9(2)     | 5.3(8)     |
| <b>Triapine <sup>a</sup></b> |           |          |                             |            |           |            |
| $[CuLH]^{2+}$                | 2.1069(3) | 73.7(4)  | 15(1),<br>10(1)             | 34.8(5)    | -18.0(1)  | 4.8(3)     |
| $[CuL]^+$                    | 2.0958(1) | 72.6(1)  | 16.7(5),<br>9.8(5)          | 23.9(2)    | -12.1(1)  | 2.0(1)     |
| $[CuLH_1]$                   | 2.0865(4) | 70.7(5)  | 14.1(4),<br>10.8(4)         | 28.6(1)    | -17.9(1)  | 4.0(1)     |

<sup>a</sup> Dara are taken from Ref. [30]

[30] É. A. Enyedy, N. V. Nagy, É. Zsigó, C. R. Kowol, V. B. Arion, A. Roller, B. K. Keppler and T. Kiss, Eur. J. Inorg. Chem., 2010, 2010, 1717, DOI: 10.1002/ejic.200901174

SUPPLEMENTARY INFORMATION

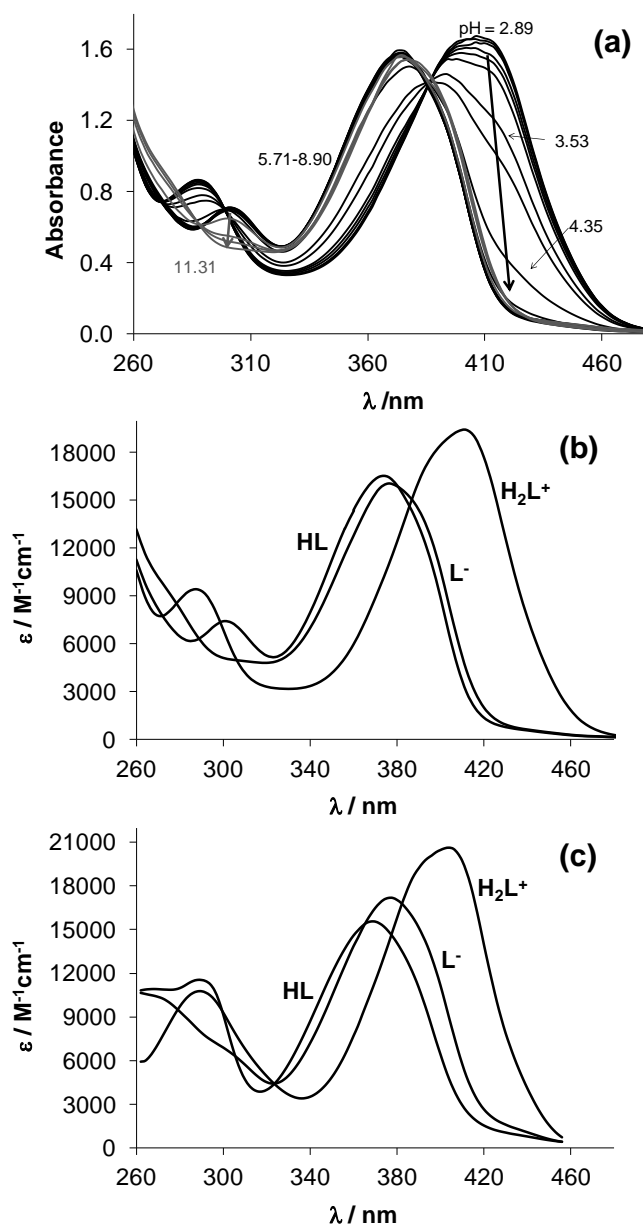

**Figure S1.** a) UV-vis absorption spectra of Se-Triapine recorded at various pH values under strictly O<sub>2</sub>-free condition. Calculated individual absorption spectra of ligand species in the case of b) Se-Triapine and c) Triapine. { $c_L = 95 \mu\text{M}$ ; 30% (w/w) DMSO/H<sub>2</sub>O;  $pH = 2 - 12.2$ ;  $T = 25 \text{ }^\circ\text{C}$ ;  $I = 0.10 \text{ M}$  (KCl);  $\ell = 1.0 \text{ cm}$ }.

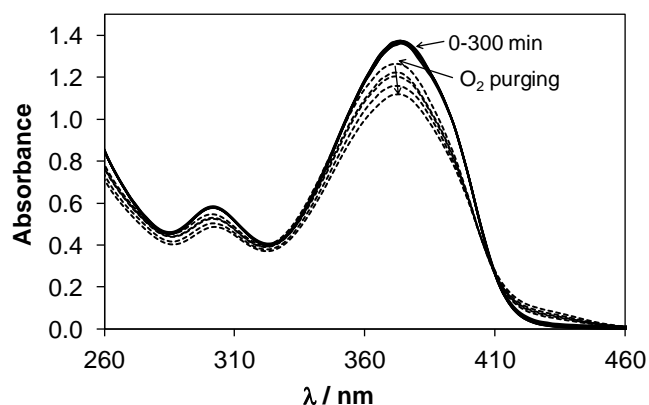

**Figure S2.** UV-vis absorption spectra of Se-Triapine recorded at pH 7.4 under strictly  $O_2$ -free condition in the period 0-300 min and effect of  $O_2$  purging.  $\{c_L = 85 \mu M; 30\% (w/w) DMSO/H_2O; pH = 7.4; T = 25 \text{ }^\circ C; I = 0.10 M (KCl); \ell = 1.0 cm\}$ .

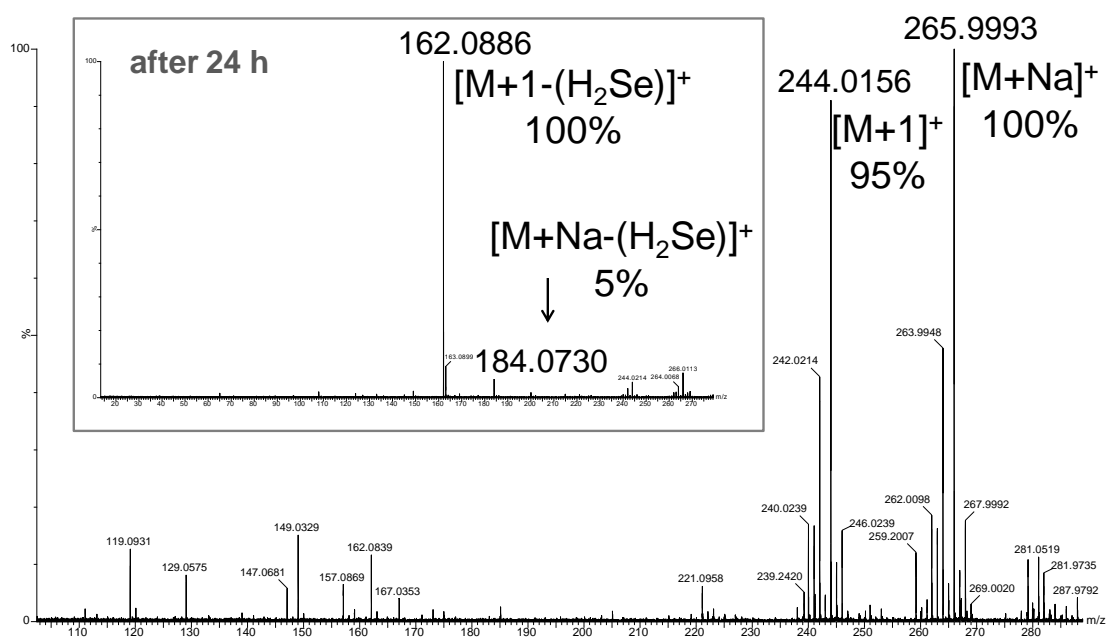

**Figure S3.** ESI-MS spectrum of Se-Triapine at pH 3.0 immediately after dissolution in water and after 24 h (the framed spectrum).  $\{c_L \sim 25 \mu M; \text{positive mode}\}$ .

SUPPLEMENTARY INFORMATION

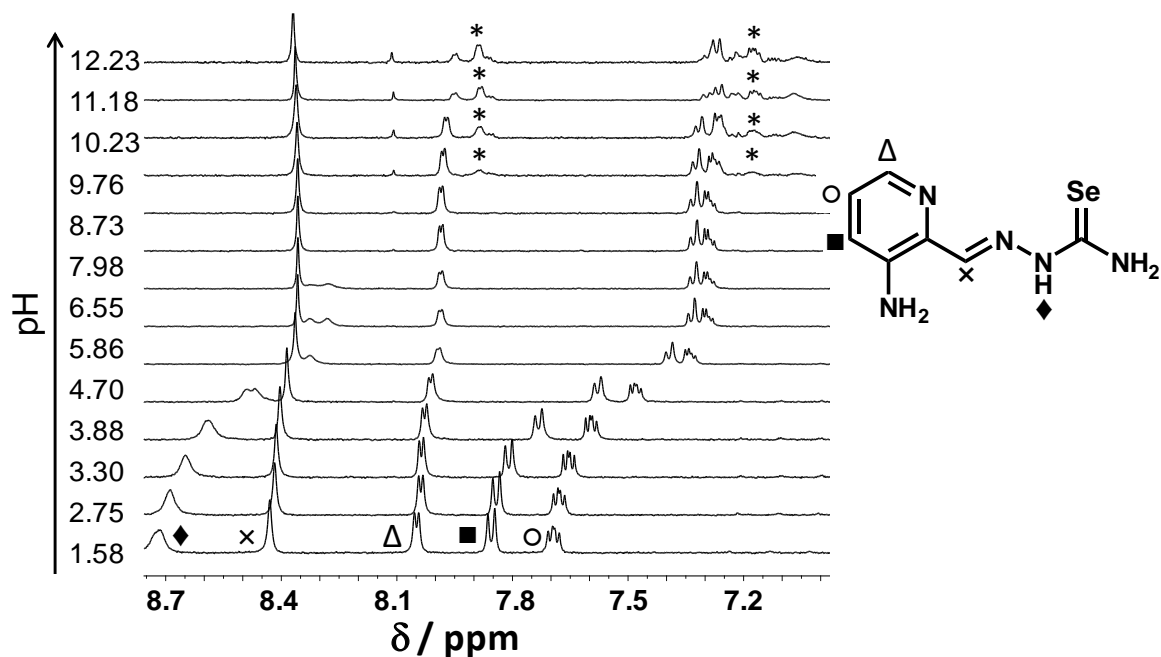

**Figure S4.**  $^1\text{H}$  NMR spectra of Se-Triapine recorded at indicated pH values together with the notation of the symbols at the various peaks. The symbol \* indicates the peaks of the decomposition product.  $\{c_L = 1.0 \text{ mM}; 30\% \text{ (v/v) } d_6\text{-DMSO}/\text{H}_2\text{O}; \text{pH} = 1.6\text{--}12.2; T = 25 \text{ }^\circ\text{C}; I = 0.10 \text{ M (KCl)}\}$ .

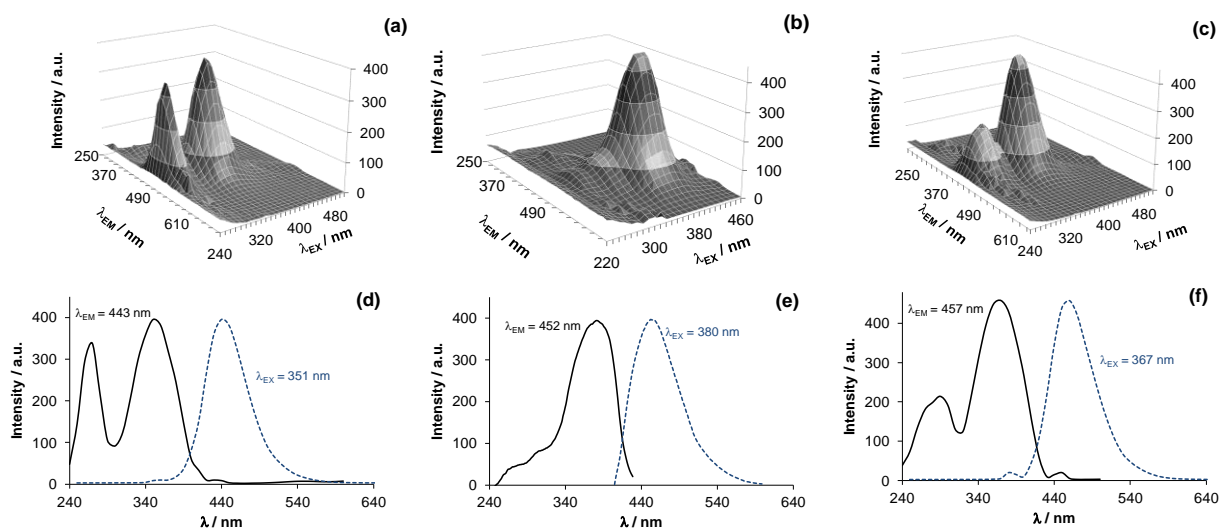

**Fig. S5.** 3D fluorescence spectra of a) O-Triapine, b) Se-Triapine and c) Me-Triapine recorded at pH 7.4. Excitation (black lines) and emission (blue dashed lines) spectra of d) O-Triapine, e) Se-Triapine and f) Me-Triapine.  $\{c_L = 10 \text{ } \mu\text{M}; 30\% \text{ (w/w) DMSO}/\text{H}_2\text{O}; \text{pH} = 7.4; T = 25 \text{ }^\circ\text{C}; I = 0.10 \text{ M (KCl)}; \ell = 1.0 \text{ cm}\}$

SUPPLEMENTARY INFORMATION

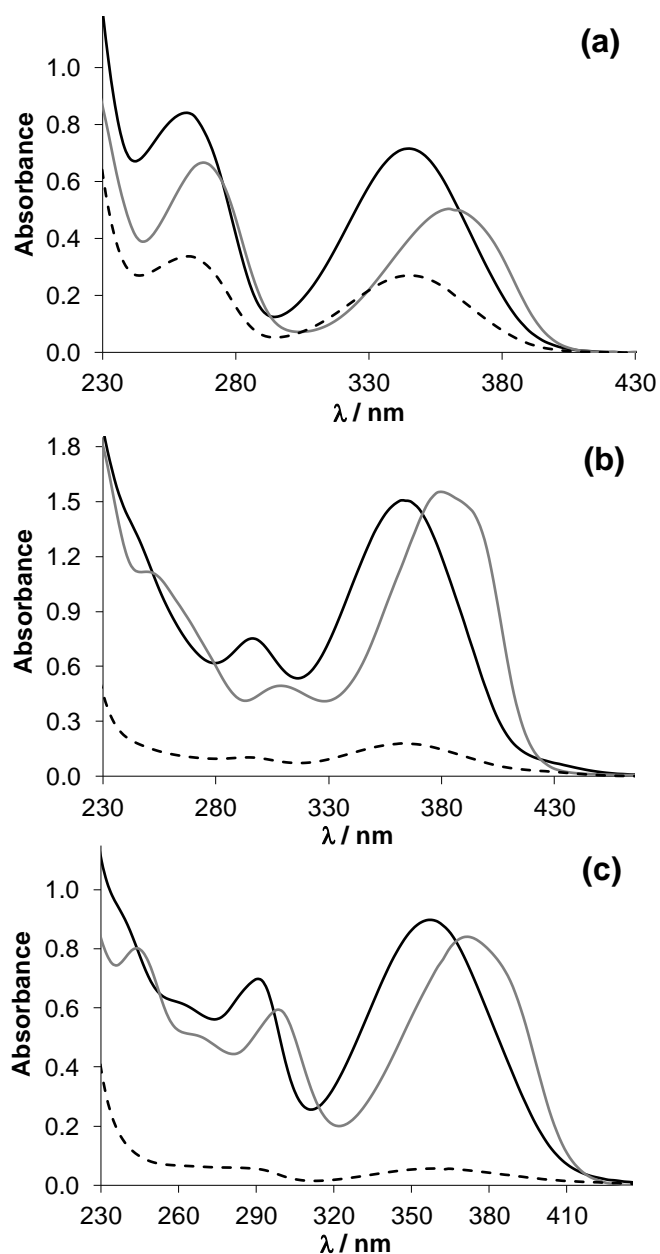

**Figure S6.** UV-vis absorption spectra of a) O-Triapine, b) Se-Triapine and c) Me-Triapine recorded for the original solution before partitioning (black solid line), in the aqueous phase (black dashed line) and in the *n*-octanol phase (grey solid line) following the separation. { $c_{O-Triapine} = 63 \mu M$ ;  $c_{Se-Triapine} = 100 \mu M$ ;  $c_{Me-Triapine} = 50 \mu M$ ;  $pH = 7.40$  (20 mM HEPES);  $T = 25 \text{ }^\circ\text{C}$ ;  $I = 0.10 \text{ M}$  (KCl);  $\ell = 1.0 \text{ cm}$ }.



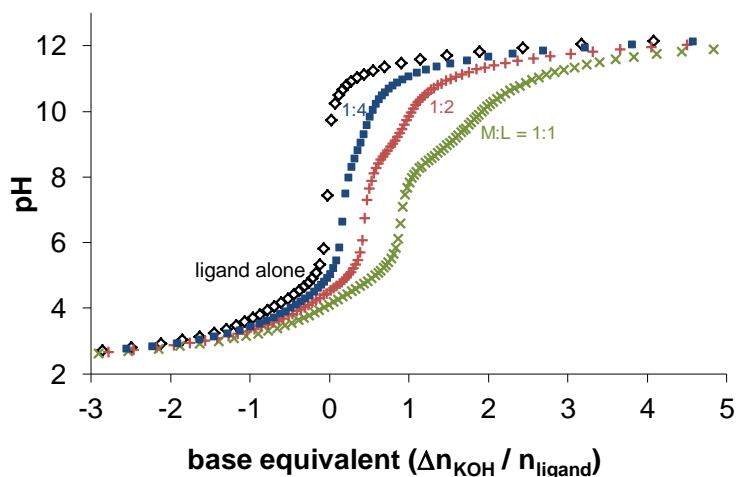

**Figure S7.** pH-potentiometric titration curves for O-Triapine (ligand alone) and for Cu(II)-O-Triapine system at various metal-to-ligand ratios.  $\{c_{O-Triapine} = 1 \text{ mM}; 30\% \text{ (w/w) DMSO/H}_2\text{O}; T = 25 \text{ }^\circ\text{C}; I = 0.10 \text{ M (KCl)}\}$ .

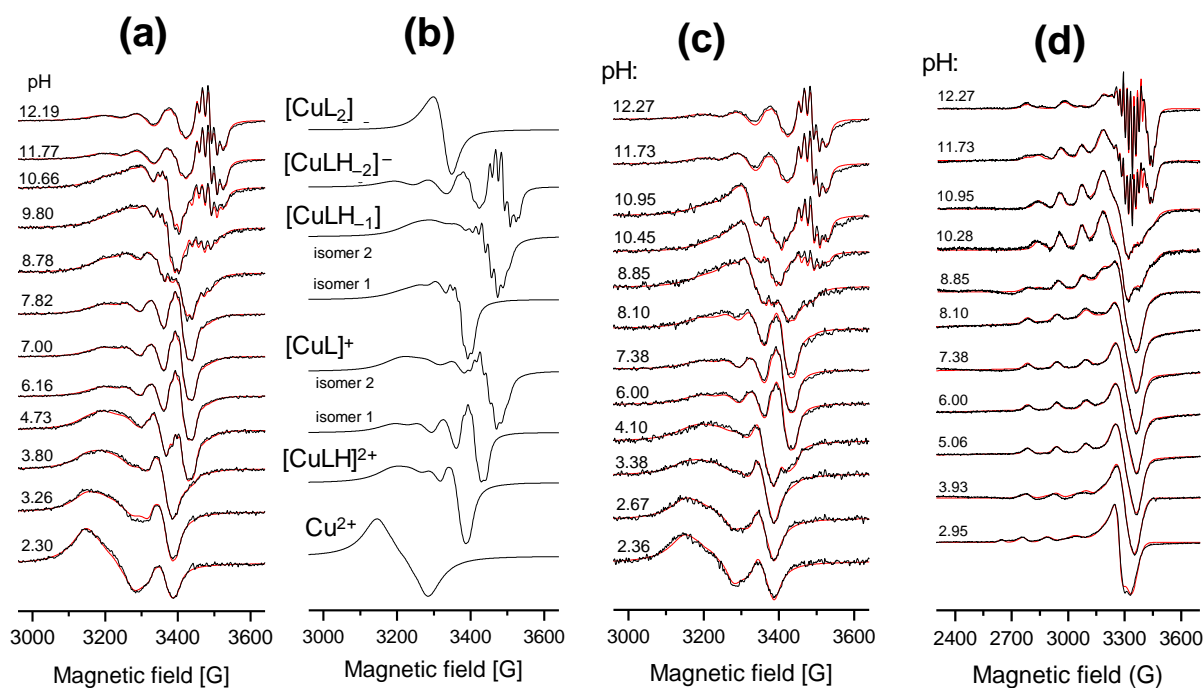

**Figure S8.** Experimental (black) and simulated (red) solution EPR spectra recorded for the Cu(II)-O-Triapine a) (1:1) system and b) the calculated component EPR spectra of the species, and the (1:2) system at c) 295 K and d) 77 K at various pH values in 30% (v/v) DMSO-water solution.  $\{c_L = 1 \text{ mM}; c_{Cu} = 1.0 \text{ or } 0.5 \text{ mM}; 30\% \text{ (w/w) DMSO/H}_2\text{O}; T = 25 \text{ }^\circ\text{C}; I = 0.10 \text{ M (KCl)}\}$ .

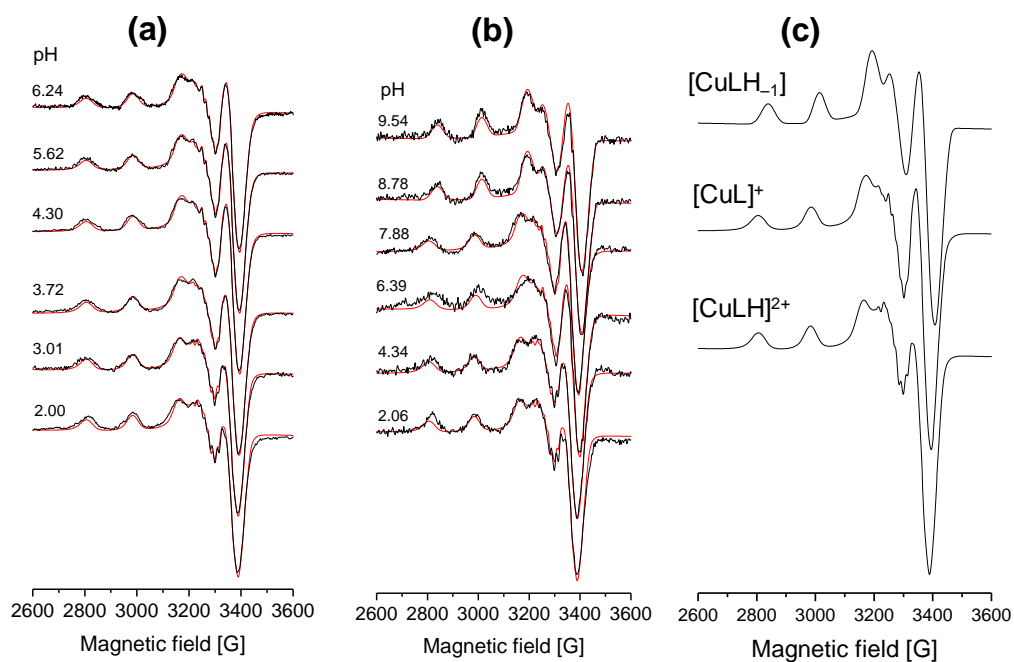

**Figure S9.** Experimental (black) and simulated (red) EPR spectra recorded for the Cu(II)–Se-Triapine system in 30% (v/v) DMSO-water solution at a) 1:1 and b) 1:2 metal-to-ligand ratio at 77 K at various pH values.  $\{c_L = 0.5 \text{ mM}; c_{Cu} = 0.5 \text{ or } 0.25 \text{ mM}; 30\% \text{ (w/w) DMSO/H}_2\text{O}; T = 25 \text{ }^\circ\text{C}; I = 0.10 \text{ M (KCl)}\}$  c) Calculated component EPR spectra obtained for the Cu(II)–Se-Triapine complexes.

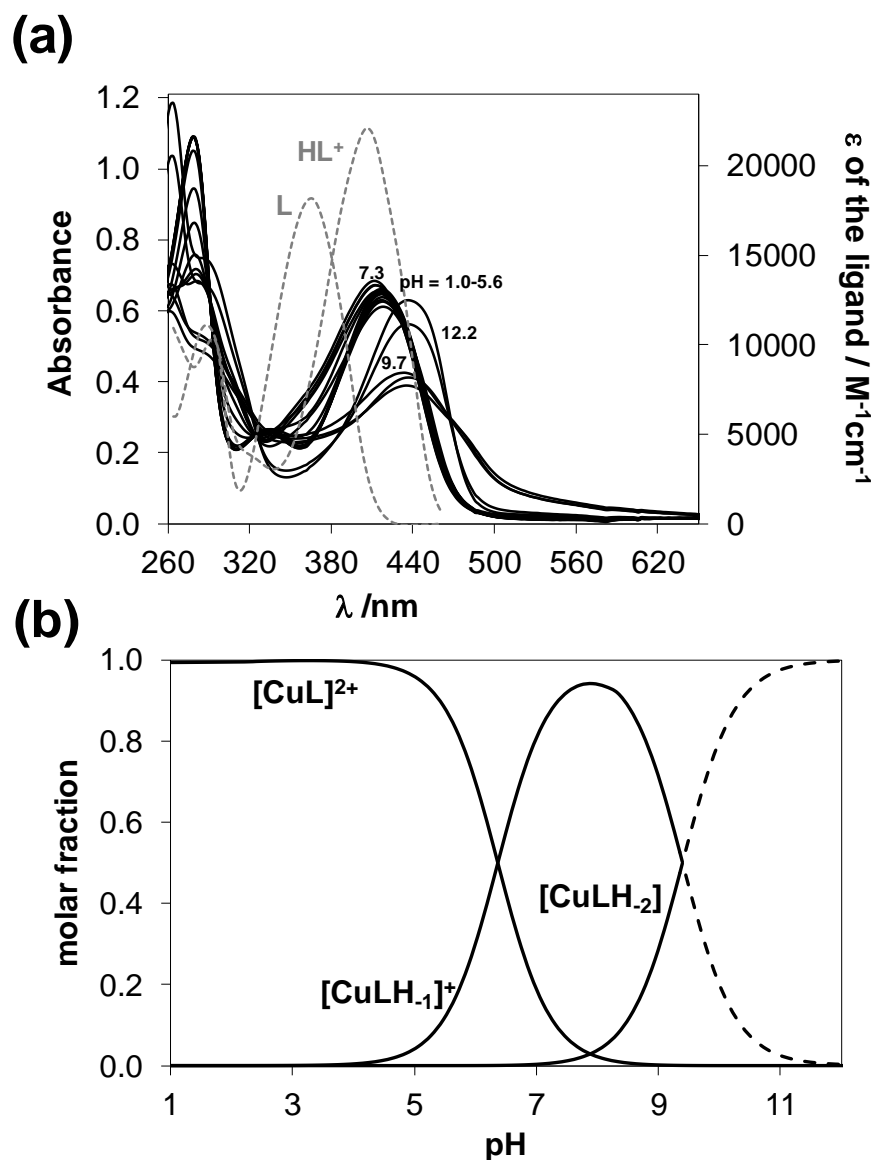

**Fig. S10.** a) UV-vis absorption spectra of Cu(II)–Me-Triapine (1:1) system recorded at various pH values (black solid lines) together with the molar absorptivity spectra of the ligand species (dashed lines). b) Concentration distribution curves for the same system.  $\{c_L = c_{Cu} = 50 \mu\text{M}; 30\% \text{ (w/w) DMSO/H}_2\text{O}; T = 25 \text{ }^\circ\text{C}; I = 0.10 \text{ M (KCl)}; \ell = 1.0 \text{ cm}\}$

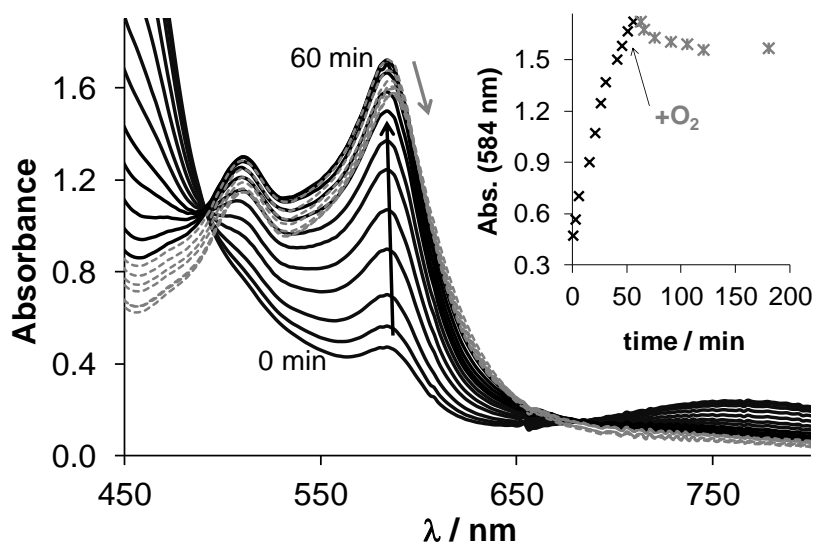

**Fig. S11.** Time-dependence of UV-vis absorption spectra of Fe(III)–Me-Triapine (1:2) system recorded at pH 7.4 revealing the decomposition with time.  $\{c_L = 1 \text{ mM}; 30\% \text{ (w/w) DMSO/H}_2\text{O}; T = 25 \text{ }^\circ\text{C}; I = 0.10 \text{ M (KCl)}; \ell = 1.0 \text{ cm}\}$

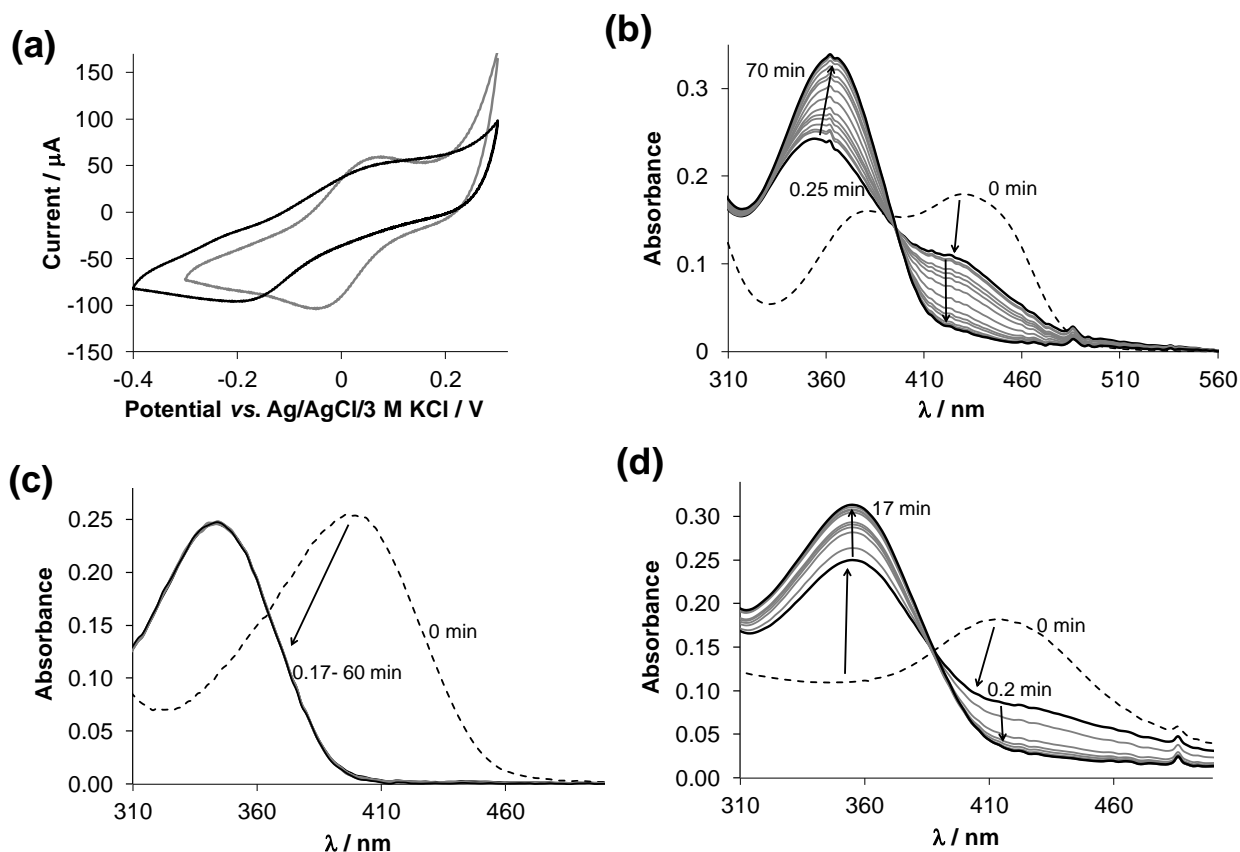

**Fig. S12.** a) Cyclic voltammograms of Cu(II)–Se-Triapine (black line) and Cu(II)–Me-Triapine (grey line) system at 1:1 metal-to-ligand ratio.  $\{c_L = c_{\text{Cu}} = 0.5 \text{ mM}; 70\text{-}30\% \text{ (v/v) DMF/}0.2 \text{ M HEPES (pH} = 7.4); T = 25 \text{ }^\circ\text{C}; I = 0.10 \text{ M (KNO}_3)\}$  Time dependent changes of the UV-vis absorption spectra of b) Cu(II)–Se-Triapine, c) Cu(II)–O-Triapine and d) Cu(II)–Me-Triapine systems in the presence of 50 equiv. GSH at pH 7.4 in buffered aqueous solution under argon.  $\{c_L = c_{\text{Cu}} = 25 \text{ } \mu\text{M}; c_{\text{GSH}} = 1.25 \text{ mM}; c_{\text{HEPES}} = 50 \text{ mM}; T = 25 \text{ }^\circ\text{C}; I = 0.10 \text{ M (KCl)}; \ell = 1.0 \text{ cm}\}$

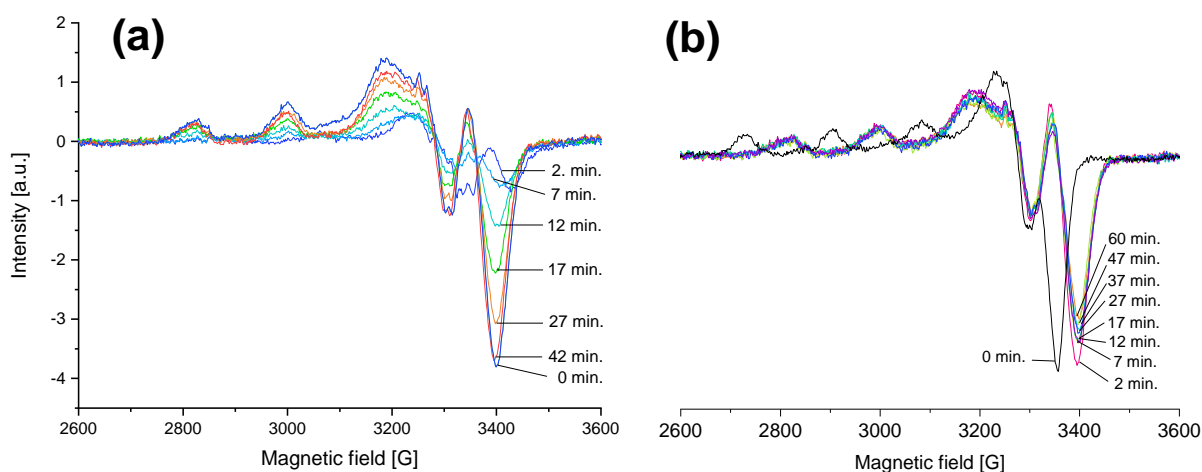

**Figure S13.** Anisotropic EPR spectra recorded for the Cu(II)–Triapine system in the presence of a) 5 equiv. GSH and b) 20 equiv. ascorbic acid at pH 7.4 under aerobic conditions.  $\{c_{\text{HEPES}} = 50 \text{ mM}; T = 25 \text{ }^\circ\text{C}; I = 0.10 \text{ M (KCl)}\}$  0 min: before the addition of the reducing agent. 2 min: the first spectrum recorded after the addition of GSH/ascorbic acid. Addition of GSH results in immediately low intensities, which was increased in time due to the re-oxidation of the Cu(II) centre. Addition of the ascorbic acid results in the shift of the peaks due to the formation of a ternary Cu(II)-Triapine-ascorbate complex, but then the signal intensity was not changed due to the lack of the reduction of Cu(II).

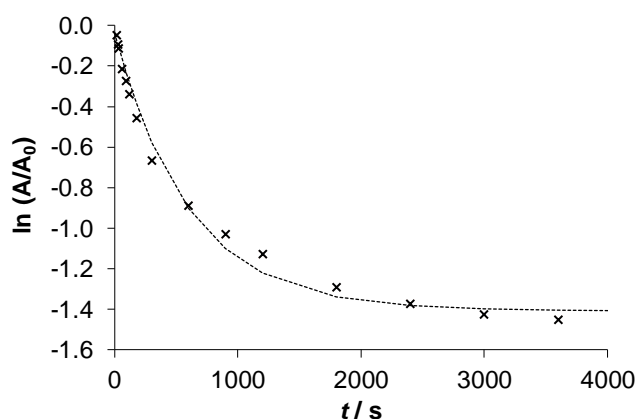

**Figure S14.** The  $\ln A/A_0$  values recorded at 370 nm plotted against the time ( $\times$ ) and the simulated curve (dashed line) for the Cu(II)–Se-Triapine system in the presence of 50 equiv. GSH at pH 7.4 in pure water under argon (A: actual absorbance,  $A_0$ : initial absorbance).  $k_{\text{obs}} = 0.113 \text{ min}^{-1}$  ( $k_{\text{obs}} = 0.110 \text{ min}^{-1}$  for Cu(II)-Triapine complex [23]).  $\{c_L = c_{\text{Cu}} = 25 \text{ } \mu\text{M}; c_{\text{GSH}} = 1.25 \text{ mM}; c_{\text{HEPES}} = 50 \text{ mM}; T = 25 \text{ }^\circ\text{C}; I = 0.10 \text{ M (KCl)}; \ell = 1.0 \text{ cm}\}$

[23] S. Hager, V. F. S. Pape, V. Pósa, B. Montsch, L. Uhlík, G. Szakács, S. Tóth, N. Jabronka, B. K. Keppler, C. R. Kowol, É. A. Enyedy and P. Heffeter, *Antioxid. Redox Signal.*, 2020, 33, 395, DOI: 10.1089/ars.2019.7854

SUPPLEMENTARY INFORMATION

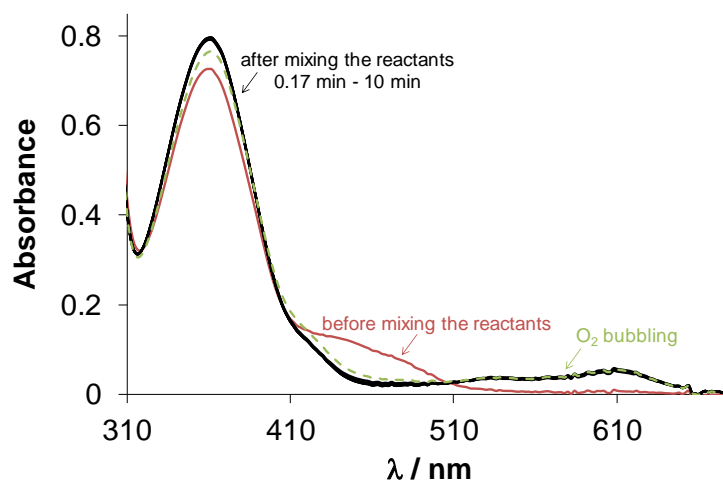

**Figure S15.** Time dependent changes of the UV-vis absorption spectra of Fe(III)–Triapine (1:2) system in the presence of 100 equiv. ascorbate at pH 7.4 in pure water under argon and effect of O<sub>2</sub> bubbling (green dashed lines). { $c_L = 50 \mu\text{M}$ ;  $c_{\text{Fe(III)}} = 25 \mu\text{M}$ ;  $c_{\text{ascorbic acid}} = 2.5 \text{ mM}$ ;  $c_{\text{HEPES}} = 50 \text{ mM}$ ;  $T = 25 \text{ }^\circ\text{C}$ ;  $I = 0.10 \text{ M (KCl)}$ ;  $\ell = 1.0 \text{ cm}$ }
